# Supplementary material for: Improving the catalytic performance of Co/BaCeO3 catalyst for ammonia synthesis by Y-modification of the perovskite-type support
Source: Royal Society of Chemistry journal article supplement (doi:10.1039/d4ra06251e), 2024-01-01
Supplement: d4ra06251e1.pdf [file d4ra06251e1.pdf]

## SUPPLEMENTARY INFORMATION

### Improving the catalytic performance of Co/BaCeO<sub>3</sub> catalyst for ammonia synthesis by Y-modification of the perovskite-type support

Magdalena Zybert <sup>a</sup>, Hubert Ronduda <sup>a\*</sup>, Wojciech Patkowski <sup>a</sup>, Andrzej Ostrowski <sup>a</sup>,  
Kamil Sobczak <sup>b</sup>, Wioletta Raróg-Pilecka <sup>a</sup>

<sup>a</sup> Warsaw University of Technology, Faculty of Chemistry, Noakowskiego 3, 00-664, Warsaw, Poland

<sup>b</sup> University of Warsaw Biological and Chemical Research Centre, Żwirki i Wigury 101, 02-089 Warsaw, Poland

\*Corresponding author

E-mail address: hubert.ronduda@pw.edu.pl

Tel. +48 22 234 76 02

#### Table of contents

**Figure S1.** TGA-MS profile of thermal decomposition of the BaCe<sub>1-x</sub>Y<sub>x</sub>O<sub>3-δ</sub> (x=0) support precursor obtained by co-precipitation.

**Figure S2.** Exemplary N<sub>2</sub> adsorption-desorption isotherms of (a) BaCe<sub>1-x</sub>Y<sub>x</sub>O<sub>3-δ</sub> (x=0) and (b) BaCe<sub>1-x</sub>Y<sub>x</sub>O<sub>3-δ</sub> (x=0.10) supports.

**Figure S3.** Exemplary N<sub>2</sub> adsorption-desorption isotherms of (a) Co/BaCe<sub>1-x</sub>Y<sub>x</sub>O<sub>3-δ</sub> (x=0) and (b) Co/BaCe<sub>1-x</sub>Y<sub>x</sub>O<sub>3-δ</sub> (x=0.10) catalyst precursors.

**Figure S4.** H<sub>2</sub>-TPR profiles of the BaCe<sub>1-x</sub>Y<sub>x</sub>O<sub>3-δ</sub> (x=0–0.30) supports.

**Figure S5.** EDX maps of distribution of Ba and Y on the Co/BaCe<sub>1-x</sub>Y<sub>x</sub>O<sub>3-δ</sub> (x=0.05–0.30) catalysts surface (catalyst after reduction in H<sub>2</sub> at 600 °C).

**Table S1.** Average reaction rate ( $r_{\text{NH}_3}$ ) of ammonia synthesis reaction over catalysts with different active metals (10 wt% of Co, Ni, Mo, or Fe) supported on BaCe<sub>1-x</sub>Y<sub>x</sub>O<sub>3-δ</sub> (x=0.10).

**Table S2.** Structural parameters of the BaCe<sub>1-x</sub>Y<sub>x</sub>O<sub>3-δ</sub> (x=0–0.30) supports based on the Rietveld analysis.

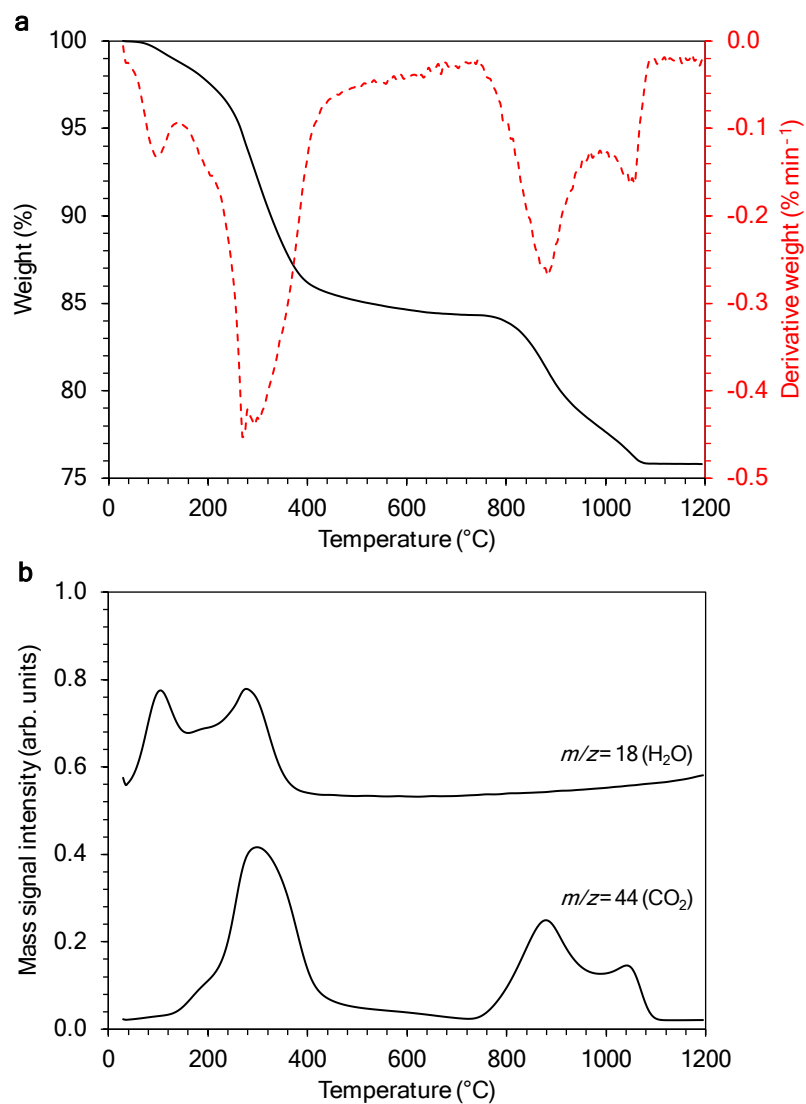

**Figure S1.** TGA-MS profile of thermal decomposition of the  $\text{BaCe}_{1-x}\text{Y}_x\text{O}_{3-\delta}$  ( $x=0$ ) support precursor obtained by co-precipitation (according to the procedure described in section 2.1). (a) mass loss curve (TG) and derivative of mass loss curve (DTG) during sample heating, (b) mass signals of water vapour ( $m/z=18$ ) and carbon dioxide ( $m/z=44$ ) evolved during sample heating (measurement conditions: 50 mg sample, flow 100 mL min<sup>-1</sup> of air, heating 10 °C min<sup>-1</sup> in the temperature range of 30–1200 °C).

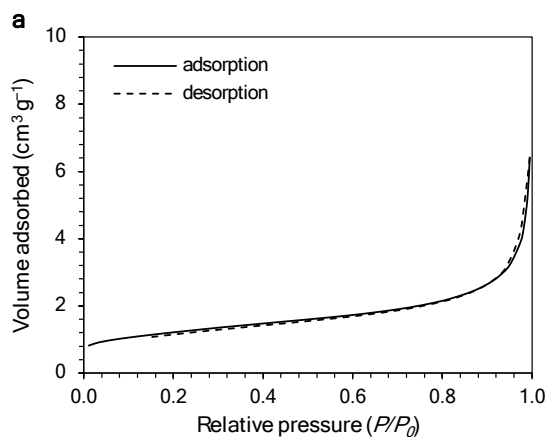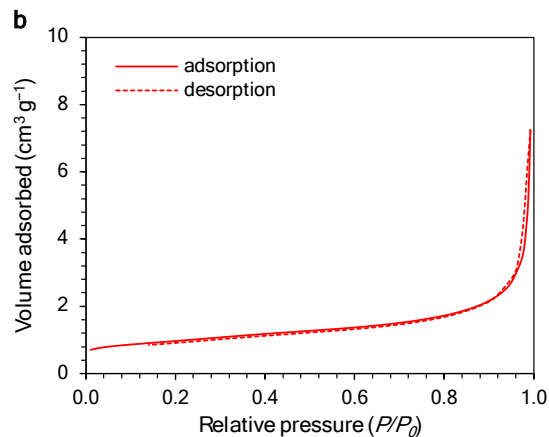

**Figure S2.** Exemplary N<sub>2</sub> adsorption-desorption isotherms of (a) BaCe<sub>1-x</sub>Y<sub>x</sub>O<sub>3-δ</sub> (x=0) and (b) BaCe<sub>1-x</sub>Y<sub>x</sub>O<sub>3-δ</sub> (x=0.10) supports.

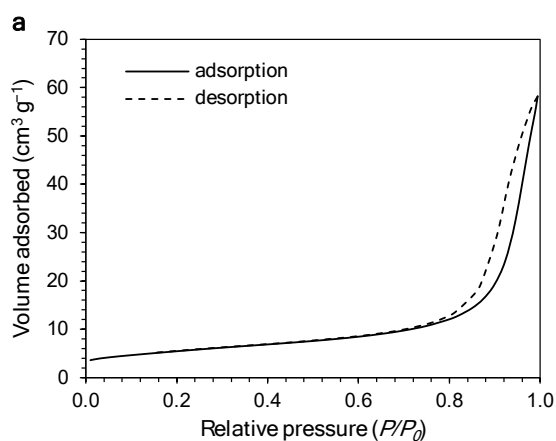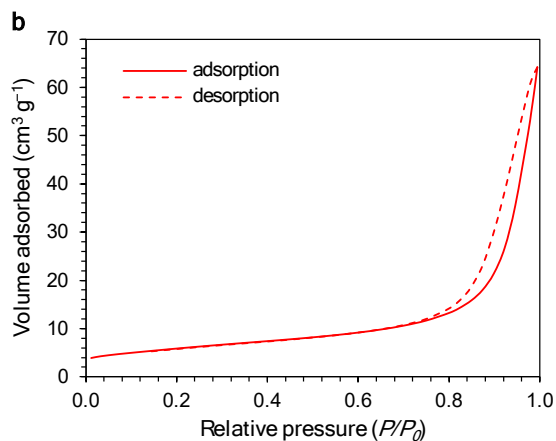

**Figure S3.** Exemplary N<sub>2</sub> adsorption-desorption isotherms of (a) Co/BaCe<sub>1-x</sub>Y<sub>x</sub>O<sub>3-δ</sub> (x=0) and (b) Co/BaCe<sub>1-x</sub>Y<sub>x</sub>O<sub>3-δ</sub> (x=0.10) catalyst precursors.

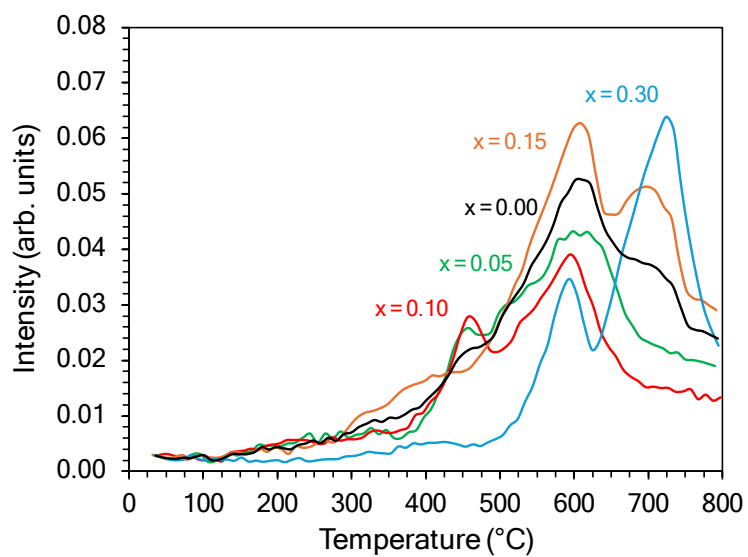

**Figure S4.** H<sub>2</sub>-TPR profiles of the BaCe<sub>1-x</sub>Y<sub>x</sub>O<sub>3-δ</sub> (x=0–0.30) supports.

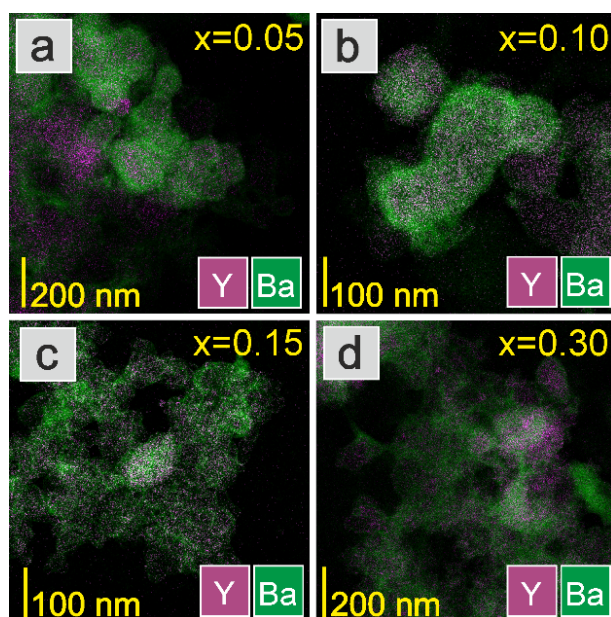

**Figure S5.** EDX maps of distribution of Ba and Y on the Co/BaCe<sub>1-x</sub>Y<sub>x</sub>O<sub>3-δ</sub> (x=0.05–0.30) catalysts surface (catalyst after reduction in H<sub>2</sub> at 600 °C).

**Table S1.** Average reaction rate ( $r_{\text{NH}_3}$ ) of ammonia synthesis reaction over catalysts with different active metals (10 wt% of Co, Ni, Mo, or Fe) supported on  $\text{BaCe}_{1-x}\text{Y}_x\text{O}_{3-\delta}$  ( $x=0.10$ ). Activation conditions: 470 °C (72 h) → 520 °C (24 h) → 550 °C (48 h) → 600 °C (24 h), flow of  $\text{H}_2/\text{N}_2$  mixture (75/25 mol%, 30  $\text{dm}^3 \text{h}^{-1}$ ), atmospheric pressure. Measurement conditions: 470°C, 6.3 MPa, flow of  $\text{H}_2/\text{N}_2$  mixture (75/25 mol%, 70  $\text{dm}^3 \text{h}^{-1}$ ).

| Catalyst                                                   | Active phase | $r_{\text{NH}_3}$ ( $\text{g}_{\text{NH}_3} \text{g}_{\text{cat}}^{-1} \text{h}^{-1}$ ) |
|------------------------------------------------------------|--------------|-----------------------------------------------------------------------------------------|
| Mo/BaCe <sub>0.90</sub> Y <sub>0.10</sub> O <sub>3-δ</sub> | Mo           | 0.01                                                                                    |
| Ni/BaCe <sub>0.90</sub> Y <sub>0.10</sub> O <sub>3-δ</sub> | Ni           | 0.14                                                                                    |
| Fe/BaCe <sub>0.90</sub> Y <sub>0.10</sub> O <sub>3-δ</sub> | Fe           | 0.32                                                                                    |
| Co/BaCe <sub>0.90</sub> Y <sub>0.10</sub> O <sub>3-δ</sub> | Co           | 2.66                                                                                    |

**Table S2.** Structural parameters of the  $\text{BaCe}_{1-x}\text{Y}_x\text{O}_{3-\delta}$  ( $x=0-0.30$ ) supports based on the Rietveld analysis.

| Support                                                 | x    | Phase       | a /Å                   | b /Å      | c /Å      | b /°      | V /Å <sup>3</sup> |
|---------------------------------------------------------|------|-------------|------------------------|-----------|-----------|-----------|-------------------|
| BaCeO <sub>3</sub>                                      | 0.00 | <i>Pmcn</i> | 8.7745(2) <sup>a</sup> | 6.2323(2) | 6.2131(2) | -         | 339.77(2)         |
| BaCe <sub>0.95</sub> Y <sub>0.05</sub> O <sub>3-δ</sub> | 0.05 | <i>Pmcn</i> | 8.7745(2)              | 6.2326(2) | 6.2148(1) | -         | 339.88(1)         |
| BaCe <sub>0.90</sub> Y <sub>0.10</sub> O <sub>3-δ</sub> | 0.10 | <i>Pmcn</i> | 8.7760(2)              | 6.2366(1) | 6.2174(1) | -         | 340.25(1)         |
| BaCe <sub>0.85</sub> Y <sub>0.15</sub> O <sub>3-δ</sub> | 0.15 | <i>Pmcn</i> | 8.7567(5)              | 6.222(1)  | 6.218(1)  | -         | 338.74(9)         |
| BaCe <sub>0.70</sub> Y <sub>0.30</sub> O <sub>3-δ</sub> | 0.30 | <i>I2/m</i> | 6.2478(4)              | 8.7676(6) | 6.2215(4) | 90.946(4) | 340.76(4)         |

<sup>a</sup> Uncertainty of the last digit (within parentheses).
